# Supplementary material
Source: MDPI journal article supplement (https://www.mdpi.com/2071-1050/15/12/9788)
Supplement: s1 [file s1]

## Supplementary material

| Item | Description                                                               |
|------|---------------------------------------------------------------------------|
| IP1  | The assurance of safety and serenity in the city                          |
| IP2  | Caliber and comfort of residential accommodations                         |
| IP3  | Superiority and accessibility of health-related services                  |
| IP4  | The standard of educational facilities and offerings                      |
| IP5  | Availability of sports and recreational amenities                         |
| IP6  | Proximity and accessibility to shopping centers and dining establishments |
| IP7  | Integrated urban mobility and public transit systems.                     |
| IP8  | Effective management of vehicular traffic                                 |
| IP9  | Strategies to regulate population density                                 |
| IP10 | Efforts to mitigate air pollution                                         |
| IP11 | Strategies for noise disturbance abatement                                |
| IP12 | Measures to combat water pollution                                        |
| IP13 | Effective systems for waste disposal and sewage treatment                 |
| IP14 | Protection and maintenance of natural areas                               |
| IP15 | Presence of lush greenery and open spaces like parks                      |
| IP16 | Upkeep of civic infrastructure and architectural aesthetics               |
| IP17 | Sufficiency of the average monthly earnings                               |
| IP18 | Balance between the cost of living and affordability                      |
| IP19 | Availability of housing options within economic reach                     |
| IP20 | Economic vibrancy and robustness of the city                              |
| IP21 | Diversity within the city's economic fabric                               |
| IP22 | Plenitude of professional prospects                                       |
| IP23 | Safeguarding of cultural landmarks and traditions                         |
| IP24 | The sense of camaraderie and identification with the community            |
| IP25 | Presence of cultural hubs such as museums and theatres.                   |
| IP26 | Plenty of opportunities for cultural engagement and amusement.            |
